# Supplementary material
Source: PubMed Central journal article supplement (PMC3957483)
Supplement: NIHMS317860-supplement-Supp_Table_S2-4.pdf [file NIHMS317860-supplement-Supp_Table_S2-4.pdf]

**Supp. Table S1. Prediction score for each SNP in putative transcription regulatory regions**

This table is available online as a separate .csv file.

**Supp. Table S2. Performance of individual feature sets and data sets**

|            | SNP-based features only | SNP-based features+ Expression-based features | SNP-based features+ Function-based features | All features excluding the feature of Distance to TSS | All features |
|------------|-------------------------|-----------------------------------------------|---------------------------------------------|-------------------------------------------------------|--------------|
| All        | 0.784767309             | 0.775183171                                   | 0.869331415                                 | 0.894740215                                           | 0.903141     |
| Monogenic  | 0.884655859             | 0.884135727                                   | 0.931412506                                 | 0.949788056                                           | 0.958155     |
| Complex    | 0.773923689             | 0.757378152                                   | 0.840505764                                 | 0.872722426                                           | 0.889062     |
| Functional | 0.77124755              | 0.767426622                                   | 0.886756535                                 | 0.906049016                                           | 0.905175     |

**Supp. Table S3. List of predicted functional SNPs**

| RefSNP id  | Associated transcript | Distance to transcription start site | Prediction Score | In LD with reported GWAS ? |
|------------|-----------------------|--------------------------------------|------------------|----------------------------|
| rs35203747 | NM_000518             | 91                                   | 1                | YES                        |
| rs36208385 | NM_001025366          | 49                                   | 0.999013889      |                            |
| rs6053     | NM_005141             | 28                                   | 0.9986           | YES                        |
| rs4341800  | NM_000515             | 208                                  | 0.998425         |                            |
| rs3122011  | NM_000567             | 100                                  | 0.998225         | YES                        |
| rs11545077 | NM_003878             | 150                                  | 0.998117063      | YES                        |
| rs2069904  | NM_000312             | 238                                  | 0.998099206      | YES                        |
| rs71640268 | NM_000515             | 292                                  | 0.998091667      |                            |
| rs2854700  | NM_000312             | 178                                  | 0.998089286      |                            |
| rs72481825 | NM_000515             | 128                                  | 0.998047619      |                            |
| rs16991480 | NM_001819             | 54                                   | 0.99795          | YES                        |
| rs11099960 | NM_005141             | 103                                  | 0.997875         | YES                        |
| rs59260042 | NM_001025366          | 179                                  | 0.997722222      |                            |
| rs2001345  | NM_000515             | 69                                   | 0.997522222      |                            |
| rs61761358 | NM_000515             | 260                                  | 0.997522222      |                            |
| rs12210204 | NM_001025366          | 662                                  | 0.997388889      |                            |
| rs1799982  | NM_000041             | 440                                  | 0.99734246       | YES                        |
| rs36203394 | NM_005141             | 19                                   | 0.997125         | YES                        |
| rs41311442 | NM_000953             | 120                                  | 0.99702381       |                            |
| rs2227395  | NM_005141             | 365                                  | 0.997            | YES                        |
| rs10399931 | NM_001276             | 157                                  | 0.996963095      | YES                        |
| rs61761357 | NM_000515             | 359                                  | 0.99667619       |                            |
| rs72654467 | NM_000041             | 51                                   | 0.996663492      | YES                        |
| rs9282609  | NM_000041             | 74                                   | 0.996614683      | YES                        |
| rs41280570 | NM_000312             | 213                                  | 0.996599206      |                            |
| rs73598766 | NM_001819             | 384                                  | 0.996446429      | YES                        |
| rs877973   | NM_000041             | 244                                  | 0.996307143      | YES                        |

| RefSNP id  | Associated transcript | Distance to transcription start site | Prediction Score | In LD with reported GWAS ? |
|------------|-----------------------|--------------------------------------|------------------|----------------------------|
| rs2070010  | NM_000508             | 69                                   | 0.99628373       |                            |
| rs2001344  | NM_000515             | 192                                  | 0.996230952      |                            |
| rs36006214 | NM_000518             | 104                                  | 0.996222222      | YES                        |
| rs55809110 | NM_015837             | 241                                  | 0.996193651      |                            |
| rs1800909  | NM_003878             | 75                                   | 0.996132143      | YES                        |
| rs2069712  | NM_000619             | 332                                  | 0.996032143      | YES                        |
| rs41311440 | NM_000953             | 29                                   | 0.99602381       |                            |
| rs61762496 | NM_000515             | 343                                  | 0.996009524      |                            |
| rs2736677  | NM_003878             | 423                                  | 0.995886905      | YES                        |
| rs56077270 | NM_000600             | 523                                  | 0.995880952      |                            |
| rs56947728 | NM_000312             | 294                                  | 0.995755952      |                            |
| rs1800788  | NM_005141             | 232                                  | 0.995740079      | YES                        |
| rs71640267 | NM_000515             | 351                                  | 0.995714286      |                            |
| rs34260214 | NM_000567             | 225                                  | 0.995671032      | YES                        |
| rs35500644 | NM_000567             | 495                                  | 0.995610317      | YES                        |
| rs6039     | NM_000131             | 123                                  | 0.995593254      | YES                        |
| rs7219235  | NM_000515             | 226                                  | 0.995485317      |                            |
| rs3813727  | NM_000519             | 53                                   | 0.995472222      | YES                        |
| rs28913904 | NM_000668             | 609                                  | 0.995372222      |                            |
| rs10482844 | NM_000131             | 122                                  | 0.995357937      | YES                        |
| rs9332097  | NM_000771             | 1514                                 | 0.995279762      |                            |
| rs2774030  | NM_000131             | 310                                  | 0.995232937      | YES                        |
| rs439382   | NM_000041             | 564                                  | 0.99515          | YES                        |
| rs17152845 | NM_005746             | 504                                  | 0.995126587      |                            |
| rs35125951 | NM_000360             | 344                                  | 0.995032937      | YES                        |
| rs41495052 | NM_000953             | 514                                  | 0.994986905      |                            |
| rs7865453  | NM_015837             | 54                                   | 0.994956349      |                            |
| rs9282659  | NM_000567             | 213                                  | 0.994947619      | YES                        |
| rs34680782 | NM_000078             | 225                                  | 0.99492619       | YES                        |

| RefSNP id  | Associated transcript | Distance to transcription start site | Prediction Score | In LD with reported GWAS ? |
|------------|-----------------------|--------------------------------------|------------------|----------------------------|
| rs3758147  | NM_003878             | 619                                  | 0.994917063      | YES                        |
| rs11558195 | NM_001819             | 122                                  | 0.994810714      | YES                        |
| rs72654466 | NM_000041             | 253                                  | 0.994767857      | YES                        |
| rs34236606 | NM_000953             | 511                                  | 0.994447619      |                            |
| rs41269713 | NM_173353             | 608                                  | 0.994391667      |                            |
| rs7032741  | NM_015837             | 279                                  | 0.994343254      |                            |
| rs11575010 | NM_002982             | 357                                  | 0.994236508      |                            |
| rs33935445 | NM_000518             | 94                                   | 0.994222222      | YES                        |
| rs72551336 | NM_007120             | 45                                   | 0.994200397      |                            |
| rs41360251 | NM_002986             | 771                                  | 0.994111111      |                            |
| rs72551121 | NM_015837             | 59                                   | 0.994087302      |                            |
| rs36208049 | NM_001025366          | 1274                                 | 0.994043254      |                            |
| rs33933811 | NM_000078             | 183                                  | 0.993997619      | YES                        |
| rs769447   | NM_000041             | 487                                  | 0.993881349      | YES                        |
| rs769445   | NM_000041             | 727                                  | 0.993878968      | YES                        |
| rs11575011 | NM_002982             | 49                                   | 0.993793651      |                            |
| rs17735961 | NM_002986             | 347                                  | 0.993561508      |                            |
| rs72551117 | NM_015837             | 839                                  | 0.993555952      |                            |
| rs13306748 | NM_002982             | 482                                  | 0.993536508      |                            |
| rs648272   | NM_002422             | 261                                  | 0.993511508      | YES                        |
| rs35382661 | NM_000518             | 106                                  | 0.993458333      | YES                        |
| rs72551118 | NM_015837             | 810                                  | 0.993288095      |                            |
| rs72551119 | NM_015837             | 543                                  | 0.993276587      |                            |
| rs2736678  | NM_003878             | 14                                   | 0.993251984      | YES                        |
| rs28913907 | NM_000668             | 237                                  | 0.993213492      |                            |
| rs36215461 | NM_000600             | 501                                  | 0.993202381      |                            |
| rs2736676  | NM_003878             | 589                                  | 0.993190476      | YES                        |
| rs1860184  | NM_002986             | 445                                  | 0.993155556      |                            |
| rs45621441 | NM_007120             | 230                                  | 0.993045635      |                            |

| RefSNP id  | Associated transcript | Distance to transcription start site | Prediction Score | In LD with reported GWAS ? |
|------------|-----------------------|--------------------------------------|------------------|----------------------------|
| rs3917465  | NM_000446             | 674                                  | 0.993017857      |                            |
| rs16966671 | NM_000101             | 817                                  | 0.992802381      |                            |
| rs35634210 | NM_000078             | 96                                   | 0.99278254       | YES                        |
| rs41269707 | NM_173353             | 378                                  | 0.992777381      |                            |
| rs13306296 | NM_000101             | 499                                  | 0.992682143      |                            |
| rs34514827 | NM_000863             | 45                                   | 0.992604365      | YES                        |
| rs41454744 | NM_002985             | 243                                  | 0.992594048      | YES                        |
| rs2069711  | NM_000619             | 312                                  | 0.992552778      | YES                        |
| rs16966669 | NM_000101             | 796                                  | 0.992534127      |                            |
| rs4783962  | NM_000078             | 797                                  | 0.992504762      | YES                        |
| rs33970907 | NM_000559             | 121                                  | 0.992496032      | YES                        |
| rs41272325 | NM_001063             | 142                                  | 0.992484127      |                            |
| rs56120942 | NM_002986             | 153                                  | 0.99241746       |                            |
| rs11575012 | NM_002982             | 46                                   | 0.992398413      |                            |
| rs3025091  | NM_002422             | 285                                  | 0.992309921      | YES                        |
| rs62191899 | NM_007120             | 70                                   | 0.992206349      |                            |
| rs33955330 | NM_000559             | 117                                  | 0.992162698      | YES                        |
| rs28365060 | NM_003878             | 545                                  | 0.992046032      | YES                        |
| rs55701929 | NM_002423             | 68                                   | 0.991972619      |                            |
| rs5884     | NM_000078             | 122                                  | 0.991947619      | YES                        |
| rs130059   | NM_000863             | 276                                  | 0.991861111      | YES                        |
| rs36208414 | NM_000131             | 419                                  | 0.991835714      | YES                        |
| rs72503766 | NM_000668             | 234                                  | 0.991834921      |                            |
| rs61733934 | NM_018242             | 172                                  | 0.991819444      | YES                        |
| rs11574981 | NM_001872             | 251                                  | 0.991815079      |                            |
| rs63751196 | NM_000559             | 115                                  | 0.991634921      | YES                        |
| rs711752   | NM_000078             | 376                                  | 0.991620238      | YES                        |
| rs1800249  | NM_001063             | 441                                  | 0.991587302      |                            |
| rs464138   | NM_002462             | 19                                   | 0.991562302      |                            |

| RefSNP id  | Associated transcript | Distance to transcription start site | Prediction Score | In LD with reported GWAS ? |
|------------|-----------------------|--------------------------------------|------------------|----------------------------|
| rs55972053 | NM_000559             | 210                                  | 0.991527778      | YES                        |
| rs7941835  | NM_000559             | 15                                   | 0.991527778      | YES                        |
| rs17245715 | NM_000078             | 845                                  | 0.991449206      | YES                        |
| rs58849201 | NM_001004056          | 54                                   | 0.991444444      |                            |
| rs35802118 | NM_000518             | 105                                  | 0.991440476      | YES                        |
| rs2860470  | NM_000184             | 306                                  | 0.991430556      | YES                        |
| rs36208384 | NM_001025366          | 44                                   | 0.991346825      |                            |
| rs2069830  | NM_000600             | 319                                  | 0.991328175      |                            |
| rs7598133  | NM_000312             | 261                                  | 0.991236111      | YES                        |
| rs41311354 | NM_000953             | 529                                  | 0.991164683      |                            |
| rs17844147 | NM_001872             | 182                                  | 0.991123413      |                            |
| rs1130459  | NM_001063             | 48                                   | 0.991123016      |                            |
| rs35086834 | NM_000567             | 78                                   | 0.991115476      | YES                        |
| rs2280789  | NM_002985             | 375                                  | 0.99107381       | YES                        |
| rs45510694 | NM_007120             | 178                                  | 0.991039683      |                            |
| rs45571233 | NM_007120             | 193                                  | 0.991039683      |                            |
| rs34389944 | NM_000519             | 272                                  | 0.991027778      | YES                        |
| rs34410778 | NM_000542             | 277                                  | 0.991017857      |                            |
| rs3024488  | NM_000572             | 507                                  | 0.99099246       |                            |
| rs35549891 | NM_000078             | 385                                  | 0.990957143      | YES                        |
| rs41311352 | NM_000953             | 709                                  | 0.990864286      |                            |
| rs6827826  | NM_001729             | 133                                  | 0.990796032      | YES                        |
| rs3816117  | NM_000078             | 323                                  | 0.990727381      | YES                        |
| rs3742266  | NM_001872             | 173                                  | 0.990688492      |                            |
| rs34018799 | NM_000559             | 113                                  | 0.990634921      | YES                        |
| rs61757167 | NM_000029             | 118                                  | 0.99063373       |                            |
| rs9658639  | NM_001275             | 341                                  | 0.99062381       |                            |
| rs33924825 | NM_000559             | 72                                   | 0.990611111      | YES                        |
| rs17231534 | NM_000078             | 269                                  | 0.990471429      | YES                        |

| RefSNP id  | Associated transcript | Distance to transcription start site | Prediction Score | In LD with reported GWAS ? |
|------------|-----------------------|--------------------------------------|------------------|----------------------------|
| rs10411464 | NM_004708             | 162                                  | 0.990455952      | YES                        |
| rs34432567 | NM_000559             | 73                                   | 0.990369048      | YES                        |
| rs34263826 | NM_000559             | 70                                   | 0.990293651      | YES                        |
| rs41298273 | NM_001063             | 85                                   | 0.99025873       |                            |
| rs57946219 | NM_000101             | 403                                  | 0.990250794      |                            |
| rs71351177 | NM_004708             | 210                                  | 0.990181349      | YES                        |
| rs36215459 | NM_000600             | 255                                  | 0.99014127       |                            |
| rs140313   | NM_000853             | 331                                  | 0.990130159      |                            |
| rs35157665 | NM_001729             | 69                                   | 0.990086111      | YES                        |
| rs34460332 | NM_000519             | 269                                  | 0.990075397      | YES                        |
| rs12828954 | NM_004064             | 569                                  | 0.990038492      |                            |
| rs11564712 | NM_000360             | 257                                  | 0.990026984      | YES                        |
| rs522616   | NM_002422             | 705                                  | 0.990025794      | YES                        |
| rs41559012 | NM_001983             | 128                                  | 0.989972619      |                            |
| rs6684919  | NM_001276             | 260                                  | 0.989966667      |                            |
| rs10142136 | NM_001007023          | 284                                  | 0.989960317      |                            |
| rs34866629 | NM_000518             | 108                                  | 0.989890476      | YES                        |
| rs17847006 | NM_001275             | 404                                  | 0.98987381       |                            |
| rs35621390 | NM_000559             | 107                                  | 0.989829365      | YES                        |
| rs34197986 | NM_000542             | 238                                  | 0.989726587      |                            |
| rs61757165 | NM_000029             | 206                                  | 0.989688095      |                            |
| rs36215817 | NM_000600             | 773                                  | 0.98954127       |                            |
| rs28730833 | NM_002982             | 198                                  | 0.98948373       |                            |
| rs41507946 | NM_002982             | 245                                  | 0.98948373       |                            |
| rs3024793  | NM_000542             | 51                                   | 0.989442063      |                            |
| rs3212935  | NM_001983             | 403                                  | 0.98938373       |                            |
| rs4108129  | NM_000766             | 1246                                 | 0.989279762      |                            |
| rs16840275 | NM_001037631          | 231                                  | 0.989275794      | YES                        |
| rs41540513 | NM_001983             | 55                                   | 0.989210714      |                            |

| RefSNP id  | Associated transcript | Distance to transcription start site | Prediction Score | In LD with reported GWAS ? |
|------------|-----------------------|--------------------------------------|------------------|----------------------------|
| rs16843684 | NM_001004056          | 333                                  | 0.989162698      |                            |
| rs231775   | NM_001037631          | 205                                  | 0.989150794      | YES                        |
| rs6298     | NM_000863             | 129                                  | 0.989069048      | YES                        |
| rs28399435 | NM_000762             | 95                                   | 0.98906746       |                            |
| rs8178901  | NM_000042             | 131                                  | 0.989060317      |                            |
| rs56283800 | NM_000762             | 153                                  | 0.989055159      |                            |
| rs10482839 | NM_000131             | 512                                  | 0.989032143      | YES                        |
| rs2222202  | NM_000572             | 459                                  | 0.98899246       | YES                        |
| rs72546660 | NM_005266             | 196                                  | 0.988966667      | YES                        |
| rs28399438 | NM_000762             | 422                                  | 0.988955159      |                            |
| rs56360274 | NM_000762             | 417                                  | 0.988955159      |                            |
| rs3024489  | NM_000572             | 404                                  | 0.98886746       |                            |
| rs3783610  | NM_001078             | 106                                  | 0.988861111      | YES                        |
| rs41432444 | NM_002986             | 295                                  | 0.988784921      |                            |
| rs8177185  | NM_001063             | 617                                  | 0.988762302      |                            |
| rs1894397  | NM_000184             | 25                                   | 0.988701587      | YES                        |
| rs10465885 | NM_181703             | 25                                   | 0.988683333      | YES                        |
| rs9658637  | NM_001275             | 13                                   | 0.98862381       |                            |
| rs28399437 | NM_000762             | 397                                  | 0.98859127       |                            |
| rs17132982 | NM_001101648          | 326                                  | 0.988486111      | YES                        |
| rs11872023 | NM_002986             | 81                                   | 0.988479365      |                            |
| rs34504099 | NM_002875             | 99                                   | 0.98846746       | YES                        |
| rs521018   | NM_000868             | 643                                  | 0.988464286      |                            |
| rs41385751 | NM_002198             | 481                                  | 0.988431349      | YES                        |
| rs33973337 | NM_000767             | 82                                   | 0.988319444      | YES                        |
| rs3212933  | NM_001983             | 42                                   | 0.988210714      |                            |
| rs9658635  | NM_001275             | 368                                  | 0.98813373       |                            |
| rs3811698  | NM_000581             | 641                                  | 0.988133333      | YES                        |
| rs34093840 | NM_000519             | 257                                  | 0.988071429      | YES                        |



| RefSNP id  | Associated transcript | Distance to transcription start site | Prediction Score | In LD with reported GWAS ? |
|------------|-----------------------|--------------------------------------|------------------|----------------------------|
| rs8192722  | NM_000762             | 218                                  | 0.987900794      |                            |
| rs1800508  | NM_000623             | 16                                   | 0.987896429      | YES                        |
| rs3797219  | NM_000762             | 610                                  | 0.987871825      |                            |
| rs4147582  | NM_000853             | 78                                   | 0.987836508      |                            |
| rs3794624  | NM_000101             | 384                                  | 0.987829365      |                            |
| rs11574982 | NM_001872             | 252                                  | 0.987796825      |                            |
| rs72546658 | NM_005266             | 188                                  | 0.987763492      | YES                        |
| rs12290216 | NM_000184             | 270                                  | 0.987706349      | YES                        |
| rs57655006 | NM_001276             | 291                                  | 0.987633333      | YES                        |
| rs4459901  | NM_001063             | 464                                  | 0.987554762      |                            |
| rs28399436 | NM_000762             | 246                                  | 0.987539286      |                            |
| rs28399416 | NM_000761             | 155                                  | 0.987528968      | YES                        |
| rs8177184  | NM_001063             | 739                                  | 0.987484127      |                            |
| rs1129844  | NM_002986             | 207                                  | 0.987411508      |                            |
| rs248743   | NM_004064             | 522                                  | 0.987350794      |                            |
| rs13447446 | NM_000600             | 110                                  | 0.987236111      |                            |
| rs34844625 | NM_000184             | 355                                  | 0.987222222      | YES                        |
| rs34289459 | NM_000519             | 276                                  | 0.987202778      | YES                        |
| rs62626349 | NM_001042599          | 168                                  | 0.98717381       |                            |
| rs8176073  | NM_007294             | 364                                  | 0.987096825      | YES                        |
| rs58554624 | NM_007120             | 170                                  | 0.987090873      |                            |
| rs8179169  | NM_000581             | 94                                   | 0.987073016      | YES                        |
| rs7159215  | NM_001275             | 325                                  | 0.987070238      |                            |
| rs2302990  | NM_000762             | 492                                  | 0.987055159      |                            |

**Supp. Table S4. Description statistics for all investigated features**

| FEATURE                                       | ITEM   | ALL          | MS       | CS       | FS       | BACKGROUND  |
|-----------------------------------------------|--------|--------------|----------|----------|----------|-------------|
| Coefficient of variation for expression level | N      | 168182       | 48       | 208      | 172      | 167754      |
| Coefficient of variation for expression level | MEDIAN | 11.06329972  | 17.80061 | 12.17694 | 11.26883 | 11.06176899 |
| Coefficient of variation for expression level | MEAN   | 12.24058306  | 19.26055 | 13.6566  | 13.38164 | 12.23564875 |
| Coefficient of variation for expression level | MIN    | 2.546574035  | 5.802231 | 4.396191 | 4.487093 | 2.546574035 |
| Coefficient of variation for expression level | MAX    | 53.70137252  | 31.02476 | 44.15748 | 31.24862 | 53.70137252 |
| Coefficient of variation for expression level | STD    | 5.745930076  | 5.076439 | 6.50731  | 6.165525 | 5.743150696 |
| Coefficient of variation for expression level | CV     | 46.94163706  | 26.35667 | 47.64955 | 46.07452 | 46.93785197 |
| Derived allele frequency                      | N      | 45235        | 2        | 106      | 71       | 45056       |
| Derived allele frequency                      | MEDIAN | 0.7944444444 | 0.957158 | 0.710037 | 0.693309 | 0.794776119 |
| Derived allele frequency                      | MEAN   | 0.702134134  | 0.957158 | 0.66044  | 0.647022 | 0.702307751 |
| Derived allele frequency                      | MIN    | 0            | 0.955056 | 0.17037  | 0.005725 | 0           |
| Derived allele frequency                      | MAX    | 1            | 0.959259 | 0.976471 | 0.997191 | 1           |
| Derived allele frequency                      | STD    | 0.277817006  | 0.002972 | 0.219572 | 0.270432 | 0.277940917 |
| Derived allele frequency                      | CV     | 39.56751173  | 0.310505 | 33.24629 | 41.79636 | 39.57537373 |
| Distance to transcription start site          | N      | 241910       | 48       | 214      | 183      | 241465      |
| Distance to transcription start site          | MEDIAN | 965          | 109.5    | 344      | 261      | 967         |
| Distance to transcription start site          | MEAN   | 1062.03054   | 169.8333 | 481.4206 | 459.377  | 1063.179202 |
| Distance to transcription start site          | MIN    | 0            | 1        | 1        | 1        | 0           |
| Distance to transcription start site          | MAX    | 2499         | 1257     | 2306     | 2313     | 2499        |
| Distance to transcription start site          | STD    | 761.4792122  | 216.6322 | 455.1627 | 515.9776 | 761.4414484 |
| Distance to transcription start site          | CV     | 71.70031212  | 127.5558 | 94.54575 | 112.3212 | 71.61929495 |
| Effective number of codons                    | N      | 240848       | 48       | 213      | 179      | 240408      |
| Effective number of codons                    | MEDIAN | 49.48        | 40.22    | 48.33    | 50.06    | 49.48       |
| Effective number of codons                    | MEAN   | 48.12359816  | 41.63313 | 47.89085 | 48.3157  | 48.12495724 |
| Effective number of codons                    | MIN    | 23.35        | 34.01    | 26.65    | 29.87    | 23.35       |
| Effective number of codons                    | MAX    | 61           | 59.44    | 61       | 61       | 61          |
| Effective number of codons                    | STD    | 6.908323254  | 7.657274 | 7.119066 | 6.668819 | 6.907583189 |

| FEATURE                           | ITEM   | ALL         | MS       | CS       | FS       | BACKGROUND  |
|-----------------------------------|--------|-------------|----------|----------|----------|-------------|
| Effective number of codons        | CV     | 14.35537557 | 18.39226 | 14.86519 | 13.80259 | 14.35343237 |
| Frequency of optimal codons       | N      | 241125      | 48       | 213      | 179      | 240685      |
| Frequency of optimal codons       | MEDIAN | 0.453       | 0.49     | 0.469    | 0.452    | 0.453       |
| Frequency of optimal codons       | MEAN   | 0.457502623 | 0.47625  | 0.474113 | 0.462615 | 0.457480383 |
| Frequency of optimal codons       | MIN    | 0.212       | 0.386    | 0.345    | 0.355    | 0.212       |
| Frequency of optimal codons       | MAX    | 0.797       | 0.593    | 0.718    | 0.594    | 0.797       |
| Frequency of optimal codons       | STD    | 0.062147284 | 0.035613 | 0.060003 | 0.057858 | 0.062153977 |
| Frequency of optimal codons       | CV     | 13.58402796 | 7.477894 | 12.65591 | 12.50664 | 13.58615126 |
| GC content                        | N      | 239918      | 47       | 214      | 181      | 239476      |
| GC content                        | MEDIAN | 10          | 12       | 11       | 11       | 10          |
| GC content                        | MEAN   | 10.20417393 | 11.2766  | 11.14019 | 11.06077 | 10.20247958 |
| GC content                        | MIN    | 0           | 7        | 4        | 2        | 0           |
| GC content                        | MAX    | 20          | 15       | 20       | 18       | 20          |
| GC content                        | STD    | 3.625532451 | 2.113128 | 3.268712 | 3.335276 | 3.626080246 |
| GC content                        | CV     | 35.52989666 | 18.73906 | 29.34163 | 30.15409 | 35.54116641 |
| In conserved non-coding sequences | N      | 241910      | 48       | 214      | 183      | 241465      |
| In conserved non-coding sequences | MEDIAN | 0           | 0        | 0        | 0        | 0           |
| In conserved non-coding sequences | MEAN   | 0.121888306 | 0.125    | 0.21028  | 0.202186 | 0.121748494 |
| In conserved non-coding sequences | MIN    | 0           | 0        | 0        | 0        | 0           |
| In conserved non-coding sequences | MAX    | 1           | 1        | 1        | 1        | 1           |
| In conserved non-coding sequences | STD    | 0.327157438 | 0.334219 | 0.408463 | 0.402732 | 0.326995781 |
| In conserved non-coding sequences | CV     | 268.4075688 | 267.3749 | 194.2469 | 199.189  | 268.58302   |
| In CpG island                     | N      | 241910      | 48       | 214      | 183      | 241465      |
| In CpG island                     | MEDIAN | 0           | 0        | 0        | 0        | 0           |
| In CpG island                     | MEAN   | 0.17554049  | 0.0625   | 0.252336 | 0.273224 | 0.175420868 |
| In CpG island                     | MIN    | 0           | 0        | 0        | 0        | 0           |
| In CpG island                     | MAX    | 1           | 1        | 1        | 1        | 1           |
| In CpG island                     | STD    | 0.380429527 | 0.244623 | 0.435372 | 0.446837 | 0.380327473 |
| In CpG island                     | CV     | 216.7189611 | 391.3968 | 172.5362 | 163.5425 | 216.8085679 |

| FEATURE                              | ITEM   | ALL         | MS       | CS       | FS       | BACKGROUND  |
|--------------------------------------|--------|-------------|----------|----------|----------|-------------|
| In enhancer                          | N      | 241910      | 48       | 214      | 183      | 241465      |
| In enhancer                          | MEDIAN | 0           | 0        | 0        | 0        | 0           |
| In enhancer                          | MEAN   | 0.017200612 | 0.416667 | 0.084112 | 0.136612 | 0.016971404 |
| In enhancer                          | MIN    | 0           | 0        | 0        | 0        | 0           |
| In enhancer                          | MAX    | 1           | 1        | 1        | 1        | 1           |
| In enhancer                          | STD    | 0.13001854  | 0.498224 | 0.278207 | 0.34438  | 0.129164408 |
| In enhancer                          | CV     | 755.8948548 | 119.5737 | 330.7569 | 252.0858 | 761.0708579 |
| In insulator                         | N      | 241910      | 48       | 214      | 183      | 241465      |
| In insulator                         | MEDIAN | 0           | 0        | 0        | 0        | 0           |
| In insulator                         | MEAN   | 0.106415609 | 0.020833 | 0.135514 | 0.136612 | 0.106383948 |
| In insulator                         | MIN    | 0           | 0        | 0        | 0        | 0           |
| In insulator                         | MAX    | 1           | 1        | 1        | 1        | 1           |
| In insulator                         | STD    | 0.308369454 | 0.144338 | 0.343074 | 0.34438  | 0.308329041 |
| In insulator                         | CV     | 289.7784046 | 692.8203 | 253.1652 | 252.0858 | 289.8266576 |
| In nuclease hypersensitive site      | N      | 241910      | 48       | 214      | 183      | 241465      |
| In nuclease hypersensitive site      | MEDIAN | 0           | 0        | 0        | 0        | 0           |
| In nuclease hypersensitive site      | MEAN   | 0.275060973 | 0.0625   | 0.378505 | 0.322404 | 0.274975669 |
| In nuclease hypersensitive site      | MIN    | 0           | 0        | 0        | 0        | 0           |
| In nuclease hypersensitive site      | MAX    | 1           | 1        | 1        | 1        | 1           |
| In nuclease hypersensitive site      | STD    | 0.44654592  | 0.244623 | 0.486152 | 0.468679 | 0.446502941 |
| In nuclease hypersensitive site      | CV     | 162.3443394 | 391.3968 | 128.44   | 145.37   | 162.3790723 |
| In RNA polymerase II enriched region | N      | 241910      | 48       | 214      | 183      | 241465      |
| In RNA polymerase II enriched region | MEDIAN | 0           | 0        | 0        | 0        | 0           |
| In RNA polymerase II enriched region | MEAN   | 0.269124881 | 0.020833 | 0.285047 | 0.245902 | 0.269177728 |
| In RNA polymerase II enriched region | MIN    | 0           | 0        | 0        | 0        | 0           |
| In RNA polymerase II enriched region | MAX    | 1           | 1        | 1        | 1        | 1           |
| In RNA polymerase II enriched region | STD    | 0.44350591  | 0.144338 | 0.452495 | 0.431802 | 0.443533418 |
| In RNA polymerase II enriched region | CV     | 164.7955806 | 692.8203 | 158.7442 | 175.5994 | 164.7734463 |
| In transcription factor binding site | N      | 241910      | 48       | 214      | 183      | 241465      |

| FEATURE                                | ITEM   | ALL         | MS       | CS       | FS       | BACKGROUND  |
|----------------------------------------|--------|-------------|----------|----------|----------|-------------|
| In transcription factor binding site   | MEDIAN | 0           | 0        | 0        | 0        | 0           |
| In transcription factor binding site   | MEAN   | 0.031763879 | 0.145833 | 0.056075 | 0.032787 | 0.031718883 |
| In transcription factor binding site   | MIN    | 0           | 0        | 0        | 0        | 0           |
| In transcription factor binding site   | MAX    | 1           | 1        | 1        | 1        | 1           |
| In transcription factor binding site   | STD    | 0.175371213 | 0.356674 | 0.230605 | 0.178567 | 0.175251027 |
| In transcription factor binding site   | CV     | 552.1089285 | 244.5764 | 411.2464 | 544.6291 | 552.5132412 |
| Maximum expression level               | N      | 168182      | 48       | 208      | 172      | 167754      |
| Maximum expression level               | MEDIAN | 10.89746734 | 16.51697 | 11.29692 | 11.81984 | 10.89595389 |
| Maximum expression level               | MEAN   | 11.10662289 | 15.23264 | 11.64668 | 11.96963 | 11.10388782 |
| Maximum expression level               | MIN    | 5.50779464  | 9.744203 | 7.257388 | 7.812712 | 5.50779464  |
| Maximum expression level               | MAX    | 17.52835185 | 17.43634 | 16.68701 | 17.04871 | 17.52835185 |
| Maximum expression level               | STD    | 1.91455089  | 2.781005 | 2.187364 | 2.059736 | 1.912186659 |
| Maximum expression level               | CV     | 17.2379211  | 18.25688 | 18.78101 | 17.20801 | 17.22087515 |
| Mean expression level                  | N      | 168182      | 48       | 208      | 172      | 167754      |
| Mean expression level                  | MEDIAN | 8.344517751 | 9.816024 | 8.130068 | 8.239046 | 8.344517751 |
| Mean expression level                  | MEAN   | 8.348121378 | 9.958372 | 8.209925 | 8.203246 | 8.347980525 |
| Mean expression level                  | MIN    | 2.716359169 | 5.062283 | 5.146559 | 5.461743 | 2.716359169 |
| Mean expression level                  | MAX    | 15.1416688  | 12.64329 | 13.51322 | 12.97615 | 15.1416688  |
| Mean expression level                  | STD    | 1.503725761 | 2.167975 | 1.4113   | 1.371667 | 1.503489497 |
| Mean expression level                  | CV     | 18.01274435 | 21.77037 | 17.19016 | 16.72102 | 18.01021808 |
| Minimum expression level               | N      | 168182      | 48       | 208      | 172      | 167754      |
| Minimum expression level               | MEDIAN | 6.14974712  | 6.375039 | 5.748052 | 6.228819 | 6.14974712  |
| Minimum expression level               | MEAN   | 6.179215217 | 6.600146 | 5.982155 | 6.195733 | 6.179322176 |
| Minimum expression level               | MIN    | -1          | 3.392317 | 1.807355 | 2.906891 | -1          |
| Minimum expression level               | MAX    | 13.30972502 | 8.304541 | 11.09002 | 10.74908 | 13.30972502 |
| Minimum expression level               | STD    | 1.645747463 | 1.472888 | 1.577413 | 1.45615  | 1.646042626 |
| Minimum expression level               | CV     | 26.63359999 | 22.31599 | 26.36864 | 23.50246 | 26.6379156  |
| Protein-protein interaction complexity | N      | 129749      | 40       | 201      | 149      | 129359      |
| Protein-protein interaction complexity | MEDIAN | 5           | 7        | 8        | 5        | 5           |

| FEATURE                                 | ITEM   | ALL         | MS       | CS       | FS       | BACKGROUND  |
|-----------------------------------------|--------|-------------|----------|----------|----------|-------------|
| Protein-protein interaction complexity  | MEAN   | 14.27493854 | 8.1      | 17.79602 | 14.87919 | 14.27068082 |
| Protein-protein interaction complexity  | MIN    | 1           | 1        | 1        | 1        | 1           |
| Protein-protein interaction complexity  | MAX    | 251         | 62       | 173      | 173      | 251         |
| Protein-protein interaction complexity  | STD    | 26.586524   | 9.994357 | 25.40813 | 28.00577 | 26.58979564 |
| Protein-protein interaction complexity  | CV     | 186.246154  | 123.3871 | 142.7742 | 188.221  | 186.3246469 |
| Sequence conservation                   | N      | 240012      | 48       | 214      | 182      | 239568      |
| Sequence conservation                   | MEDIAN | 0.004428571 | 0.172286 | 0.007024 | 0.004762 | 0.004428571 |
| Sequence conservation                   | MEAN   | 0.104558197 | 0.240896 | 0.130101 | 0.11593  | 0.104499424 |
| Sequence conservation                   | MIN    | 0           | 0        | 0        | 0        | 0           |
| Sequence conservation                   | MAX    | 1           | 0.993714 | 0.999952 | 0.998667 | 1           |
| Sequence conservation                   | STD    | 0.241781198 | 0.260133 | 0.259074 | 0.239628 | 0.241755551 |
| Sequence conservation                   | CV     | 231.2407876 | 107.9856 | 199.1335 | 206.6995 | 231.3462995 |
| SNP diversity                           | N      | 45235       | 2        | 106      | 71       | 45056       |
| SNP diversity                           | MEDIAN | 0.270048884 | 0.082005 | 0.367295 | 0.340813 | 0.268619779 |
| SNP diversity                           | MEAN   | 0.263922419 | 0.082005 | 0.353004 | 0.312562 | 0.26364427  |
| SNP diversity                           | MIN    | 0           | 0.078162 | 0.045952 | 0.005602 | 0           |
| SNP diversity                           | MAX    | 0.5         | 0.085848 | 0.499929 | 0.499971 | 0.5         |
| SNP diversity                           | STD    | 0.168101556 | 0.005435 | 0.127662 | 0.159541 | 0.168133663 |
| SNP diversity                           | CV     | 63.69354954 | 6.627341 | 36.16446 | 51.04291 | 63.77292505 |
| Standard deviation for expression level | N      | 168182      | 48       | 208      | 172      | 167754      |
| Standard deviation for expression level | MEDIAN | 0.916624714 | 2.250583 | 0.964512 | 0.924345 | 0.91632799  |
| Standard deviation for expression level | MEAN   | 0.979989378 | 1.908862 | 1.084335 | 1.057783 | 0.979514454 |
| Standard deviation for expression level | MIN    | 0.262302324 | 0.53493  | 0.389662 | 0.391889 | 0.262302324 |
| Standard deviation for expression level | MAX    | 3.517978462 | 2.856553 | 2.31765  | 2.877258 | 3.517978462 |
| Standard deviation for expression level | STD    | 0.391533256 | 0.57041  | 0.443843 | 0.428915 | 0.391025356 |
| Standard deviation for expression level | CV     | 39.95280614 | 29.88222 | 40.93225 | 40.54844 | 39.92032522 |
